# Supplementary material for: Pediatric Dentists’ Service Provisions in South-East Europe during the First Wave of COVID-19 Epidemic: Lessons Learned about Preventive Measures and Personal Protective Equipment Use
Source: MDPI journal article supplement (doi:10.3390/ijerph182211795), 2021-11-10
Supplement: s1 [file s1]

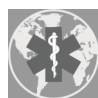

Supplementary Table

**Table S1.** Adherence to universal precaution measures and PPE use.

| Universal precaution measures                                                                                                                                                    | Other specialists<br>n (%) | Pediatric dentists<br>n (%) | All specialists<br>n (%) | p value |
|----------------------------------------------------------------------------------------------------------------------------------------------------------------------------------|----------------------------|-----------------------------|--------------------------|---------|
| Phone Triage                                                                                                                                                                     | 179 (71.0)                 | 56 (61.5)                   | 235 (68.5)               | 0.095   |
| Appointments reduced to avoid overcrowding of the waiting room                                                                                                                   | 188 (74.6)                 | 60 (65.9)                   | 248 (72.3)               | 0.113   |
| Postponement of routine treatment for elderly or vulnerable patients                                                                                                             | 157 (62.3)                 | 50 (54.9)                   | 207 (60.3)               | 0.219   |
| Handle disinfection several times a day                                                                                                                                          | 210 (83.3)                 | 70 (76.9)                   | 280 (81.6)               | 0.176   |
| Disinfection of push buttons and chairs several times a day                                                                                                                      | 178 (70.6)                 | 55 (60.4)                   | 233 (67.9)               | 0.074   |
| Assessment of patients' health on/before arrival                                                                                                                                 | 190 (75.4)                 | 65 (71.4)                   | 255 (74.3)               | 0.458   |
| Measuring patients' body temperature                                                                                                                                             | 91 (36.1)                  | 29 (31.9)                   | 120 (35.0)               | 0.467   |
| Measuring body temperature of all dental team members                                                                                                                            | 56 (22.2)                  | 15 (16.5)                   | 71 (20.7)                | 0.247   |
| Obligatory sanitizing patients' hands                                                                                                                                            | 208 (82.5)                 | 68 (74.7)                   | 276 (80.5)               | 0.107   |
| Physical distance in the waiting room                                                                                                                                            | 142 (56.3)                 | 45 (49.5)                   | 187 (54.5)               | 0.257   |
| Patients waiting outside the office until called in                                                                                                                              | 124 (49.2)                 | 38 (41.8)                   | 162 (47.2)               | 0.223   |
| Patients wearing masks in the waiting room                                                                                                                                       | 202 (80.2)                 | 60 (65.9)                   | 262 (76.4)               | 0.006   |
| Frequent waiting room ventilation                                                                                                                                                | 210 (83.3)                 | 64 (70.3)                   | 274 (79.9)               | 0.008   |
| Removal of magazines, toys, and books from the waiting area                                                                                                                      | 155 (61.5)                 | 49 (53.8)                   | 204 (59.5)               | 0.202   |
| Storage of coats, bags and other items outside the treatment room                                                                                                                | 66 (26.2)                  | 15 (16.5)                   | 81 (23.6)                | 0.062   |
| Rinsing with 1% hydrogen peroxide mouthwash before treatment                                                                                                                     | 148 (58.7)                 | 45 (49.5)                   | 193 (56.3)               | 0.126   |
| Rinsing with chlorhexidine 0.12-0.2% mouthwash before treatment                                                                                                                  | 33 (31.1)                  | 5 (5.5)                     | 38 (11.1)                | 0.048   |
| Rinsing with 0.2-1% iodopovidone mouthwash before treatment                                                                                                                      | 27 (10.7)                  | 8 (8.8)                     | 35 (10.2)                | 0.603   |
| Rinsing with alcohol and essential oils mouthwash before treatment                                                                                                               | 8 (3.2)                    | 2 (2.2)                     | 10 (2.9)                 | 0.635   |
| Rinsing with 0.05-0.10% Cetylpyridinium chloride mouthwash before treatment                                                                                                      | 4 (1.6)                    | 2 (2.2)                     | 6 (1.7)                  | 0.703   |
| Rinsing with commercial mouthwash                                                                                                                                                | 20 (7.9)                   | 6 (6.6)                     | 26 (7.6)                 | 0.678   |
| Ventilation of the treatment room for at least 10 minutes after each patient                                                                                                     | 136 (54.0)                 | 50 (54.9)                   | 186 (54.2)               | 0.873   |
| Surface disinfection with 70% ethyl alcohol                                                                                                                                      | 200 (79.4)                 | 72 (79.1)                   | 272 (79.3)               | 0.961   |
| Surface disinfection with 0.5% sodium hypochlorite                                                                                                                               | 96 (38.1)                  | 24 (26.4)                   | 120 (35.0)               | 0.044   |
| Surface disinfection using disinfectants with other active ingredients                                                                                                           | 88 (34.9)                  | 26 (28.6)                   | 114 (33.2)               | 0.270   |
| Obligatory washing dentist's hands before and after each procedure                                                                                                               | 222 (88.1)                 | 80 (87.9)                   | 302 (88.0)               | 0.963   |
| Disposal of all single used protective devices and disinfection of non-disposable devices                                                                                        | 197 (78.2)                 | 66 (72.5)                   | 263 (76.7)               | 0.275   |
| Not using AGP such as high-speed dental handpiece or ultrasonic instruments                                                                                                      | 87 (34.5)                  | 33 (36.3)                   | 120 (35.0)               | 0.765   |
| Using aerosol generating procedures such as high-speed dental handpiece or ultrasonic instruments in separated well ventilated room, at the end of shift with respirator mask on | 66 (26.2)                  | 17 (18.7)                   | 83 (24.2)                | 0.152   |
| <b>Personal protective equipment</b>                                                                                                                                             |                            |                             |                          |         |
| Surgical mask                                                                                                                                                                    | 209 (83.3)                 | 73 (83.9)                   | 282 (83.4)               | 0.890   |

**Table S1.** Adherence to universal precaution measures and PPE use.

| <b>Universal precaution measures</b>           | <b>Other<br/>specialists<br/>n (%)</b> | <b>Pediatric<br/>dentists<br/>n (%)</b> | <b>All<br/>specialists<br/>n (%)</b> | <b>p value</b> |
|------------------------------------------------|----------------------------------------|-----------------------------------------|--------------------------------------|----------------|
| Respirator mask                                | 95 (37.9)                              | 27 (31.0)                               | 122 (36.1)                           | 0.233          |
| Visor                                          | 216 (86.1)                             | 80 (92.0)                               | 296 (87.6)                           | 0.151          |
| Breathable disposable gown/coverall            | 64 (25.5)                              | 31 (35.6)                               | 95 (28.1)                            | 0.070          |
| Water repellent disposable gown/coverall       | 33 (13.1)                              | 12 (13.8)                               | 45 (13.3)                            | 0.879          |
| Goggles                                        | 135 (53.8)                             | 49 (56.3)                               | 184 (54.4)                           | 0.682          |
| Sterile gloves                                 | 102 (40.6)                             | 25 (28.7)                               | 127 (37.6)                           | 0.048          |
| Non-sterile gloves                             | 178 (70.9)                             | 65 (74.7)                               | 243 (71.9)                           | 0.497          |
| Rotating instrument with anti-retraction valve | 13 (5.2)                               | 4 (4.6)                                 | 17 (5.0)                             | 0.831          |
| Rubber dam                                     | 16 (6.4)                               | 2 (2.3)                                 | 18 (5.3)                             | 0.145          |
| Reusing or prolonged using of PPE              | 47 (18.7)                              | 20 (23.0)                               | 67 (19.8)                            | 0.390          |
| Using disposable caps only single use          | 105 (41.8)                             | 30 (34.5)                               | 135 (39.9)                           | 0.228          |
| Using disposable gowns single use              | 66 (26.3)                              | 15 (17.2)                               | 81 (24.0)                            | 0.088          |
